# Supplementary material for: Pan-Cancer Multi-Omics Analysis Uncovers CHD4 Driving Tumor Progression via Epigenetic Regulation of Genomic Stability and the Immune Microenvironment
Source: Research Square preprint supplement (doi:10.21203/rs.3.rs-8358598/v1), 2025-12-30
Supplement: Supplementary file 1 [file 483ec8822e10ee1dff4fb3f8.pdf]

## Supplementary material 3

### Experimental methods For: Pan-Cancer Multi-Omics Analysis Uncovers CHD4 Driving Tumor Progression via Epigenetic Regulation of Genomic Stability and the Immune Microenvironment

#### Cell lines and culture

All cell lines were obtained from Shanghai Jinyuan Biotechnology (Shanghai, China) and cultured under standard conditions (37°C, 5% CO<sub>2</sub>) using their respective media: hFOB 1.19 cells in special osteoblast medium (CM-H042); 143B cells in special medium (JY-H056); HOS and U-2OS cells in MEM (Gibco, 11095080); Saos-2 cells in McCoy's 5A medium (JY-H032). All media were supplemented with 10% fetal bovine serum (excluding Saos-2 with 15% FBS) and 1% penicillin-streptomycin.

#### Lentiviral Vector Construction and CHD4 Knockdown

Three specific shRNA sequences targeting human CHD4 (NCBI Gene ID: 1108) and a non-targeting control shRNA were designed based on the NM\_001273.4 transcript variant and cloned into the pLVX-shRNA1-Puro vector using BamH I and EcoR I restriction sites (1605 and 1611, Takara, Beijing, China). The targeting sequences were:

shCHD4-#1: 5'-CGAAGGTTTAAGCTCTTAGAA-3'

shCHD4-#2: 5'-GCGGGAGTTCAGTACCAATAA-3'

shCHD4-#3: 5'-CCTTACTAGAATTGGTGTTAT-3'

Vectors were verified by sequencing and transformed into Stbl3 competent cells (DLC106, Tsingke, Beijing, China). High-quality plasmids were extracted using the Plasmid Mini/Midiprep Kit (CW2581S, Cwbio, Jiangsu, China).

#### Lentiviral Transduction and Stable Cell Line Selection

Lentiviruses were packaged in 293T cells by co-transfection of CHD4-targeting shRNA plasmids and packaging plasmids (pLV-Helper1.0 and pLV-Helper2.0, Biomedicine Biotechnology, Chongqing, China) using Lentifusion Max transfection reagent (Biomedicine Biotechnology, Chongqing, China). Viral supernatants were harvested at 48 and 72 h post-transfection, concentrated with PEG-8000 (1546605, Sigma-Aldrich, MO, USA), and titers were quantified by RT-qPCR.

For transduction, 143B and Saos-2 cells were seeded in 24-well plates and infected with lentiviruses at a multiplicity of infection (MOI) of 20 and 10, respectively, in the presence of 8  $\mu$ g/mL polybrene (C0351-1ml, Beyotime, Shanghai, China). After 48 h, stable knockdown polyclonal cells were selected using 3  $\mu$ g/mL puromycin (St551-10mg, Beyotime, Shanghai, China) for 7 days.

#### RNA Extraction and Quantitative Real-Time PCR

Total RNA was extracted from cells using TRIzol Reagent (CW0580S, Cwbio, Jiangsu, China). RNA concentration and purity were determined using a NanoDrop spectrophotometer

(Thermo Fisher, Waltham, MA, USA). cDNA was synthesized from 2 µg of total RNA using the Goldenstar™ RT6 cDNA Synthesis Kit (TSK302M, Tsingke, Beijing, China). Quantitative PCR was performed using 2×T5 Fast qPCR Mix (TSE202, Tsingke, Beijing, China) on a QuantStudio 5 Real-Time PCR System (Applied Biosystems, Foster City, CA, USA). The primer sequences used were:

CHD4-F: 5'-CCACCCACCCAGAAAATGA-3'

CHD4-R: 5'-CTGCCGGCATAAGAGCATAC-3'

GAPDH-F: 5'-TCATGACCACAGTCCATGCC-3'

GAPDH-R: 5'-CAGATCCACGACGGACACAT-3'

Amplification conditions were: 95°C for 30 s, followed by 40 cycles of 95°C for 5 s and 60°C for 30 s. Relative gene expression was calculated using the  $2^{-\Delta\Delta Ct}$  method with GAPDH as the internal control.

### **Western blotting**

Cells were lysed in RIPA buffer (P0013B, Beyotime, Shanghai, China) containing protease and phosphatase inhibitor cocktail (P1045, Beyotime, Shanghai, China). Protein concentrations were determined using a BCA Protein Assay Kit (23227, Thermo Fisher, Waltham, MA, USA). Equal amounts of protein were separated by 10% SDS-PAGE and transferred to PVDF membranes (10600023, Amersham, Germany). Membranes were blocked with 5% non-fat milk for 1 h at room temperature and incubated overnight at 4°C with the following primary antibodies: anti-CHD4 (YM8880, 1:2000; Immunoway, Plano, TX, USA), anti-MMP2 (YM8451, 1:2000; Immunoway, Plano, TX, USA), anti-MMP9 (YT1892, 1:1000; Immunoway, Plano, TX, USA), and anti-GAPDH (A19056, 1:50,000; Abclonal, Wuhan, China). After incubation with HRP-conjugated goat anti-rabbit secondary antibody (1:5000; AS014, Abclonal, Wuhan, China), protein bands were visualized using ECL reagent (34580, Thermo Fisher, Waltham, MA, USA) and quantified with ImageJ software.

### **Cell proliferation assay**

The CCK-8 cell viability kit (C0038, Beyotime, Shanghai, China) was employed to assess the proliferative capacities of OS cells (143B and Saos-2) in accordance with the manufacturer's instructions. CCK-8 experiments were conducted by seeding and sustaining 5000 cells in 96-well plates for durations of 1, 2, or 3 days. Fresh medium was substituted with 100 µL, and 10 µL of CCK-8 was included. The cells were subsequently cultured for 2 hours before the OD-450 measurement (CMax Plus, Molecular Devices, San Jose, CA, USA).

### **Colony formation assay**

Cells were seeded in 6-well plates at a density of 750 cells per well and cultivated for 14 days, with the media replaced every 4 days. The cells were then treated with methanol and stained with 0.5% crystal violet (G1062, Solarbio, Beijing, China). An inverted microscope (CKX41, Olympus, Tokyo, Japan) was used to count colonies that had more than 50 cells.

### **Wound-healing assay**

Cells were seeded in 6-well plates and grown to full confluence. A sterile 10  $\mu$ L pipette tip was used to create a linear scratch. After washing with PBS to remove detached cells, serum-free medium was added. Images of the wound were captured at 0 and 24 hours post-scratching using an inverted microscope (CKX41, Olympus, Tokyo, Japan). The migration rate was quantified by measuring the remaining wound area using ImageJ software.

#### **Transwell invasion assays**

Cell invasion was assessed utilizing 24-well Transwell chambers (8  $\mu$ m pore size; 3422, Corning, NY, USA) that were pre-coated with Matrigel (354234, Corning, NY, USA). Cells ( $5 \times 10^5$ ) in serum-free medium were seeded into the upper chamber, while medium containing 20% FBS was added to the lower chamber as a chemoattractant. After 24 hours of incubation, a cotton swab was used to remove cells that had not invaded the upper surface. Cells that had invaded the lower membrane were fixed with 4% paraformaldehyde, stained with 0.1% crystal violet (G1062, Solarbio, Beijing, China), and enumerated in five random fields under microscopic observation.
